# Supplementary material for: Stage-Specific Effect of Inositol Hexaphosphate on Cancer Stem Cell Pool during Growth and Progression of Prostate Tumorigenesis in TRAMP Model
Source: MDPI journal article supplement (doi:10.3390/cancers14174204), 2022-08-30
Supplement: s1 [file s1]

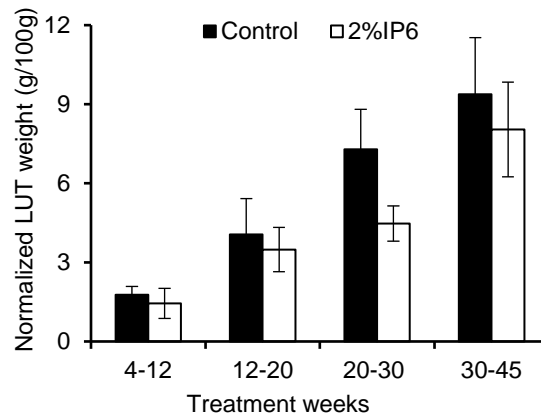

**Supplementary Figure S1.** Stage-specific effect of IP6 feeding on the LUT weight of TRAMP mice. Quantified data are represented as columns (mean for each group); bars represent mean $\pm$ SEM. *IP6*, inositol hexaphosphate. LUT, lower urinogenital tract (prostate, bladder, and seminal vesicles).

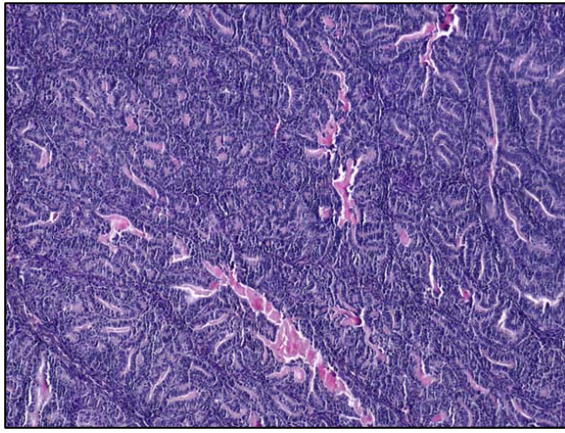

**Control**

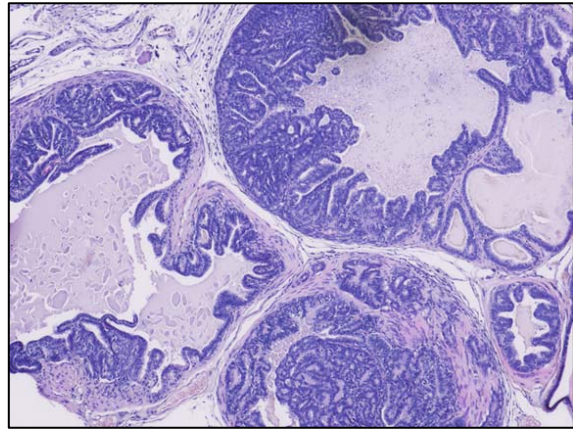

**2% IP6**

**Supplementary Figure S2.** Representative pictographs (x100 magnification) of H&E stained dorsolateral prostate tissue from TRAMP control (left) and IP6-fed TRAMP mice (right) in the 30-45 week group. *IP6*, inositol hexaphosphate.
